# Supplementary material for: Strain-driven half-metallicity in a ferri-magnetic Mott-insulator Lu2NiIrO6: a first-principles perspective
Source: Royal Society of Chemistry journal article supplement (doi:10.1039/d0cp02811h), 2020-01-01
Supplement: d0cp02811h1.pdf [file d0cp02811h1.pdf]

## Supporting Information

### Strain-Driven Half-Metallicity in a Ferri-Magnetic Mott-Insulator $\text{Lu}_2\text{NiIrO}_6$ : A First-Principles Perspective

S. Nazir\*

*Department of Physics, University of Sargodha, Sargodha Campus, 40100 Sargodha, Pakistan.*

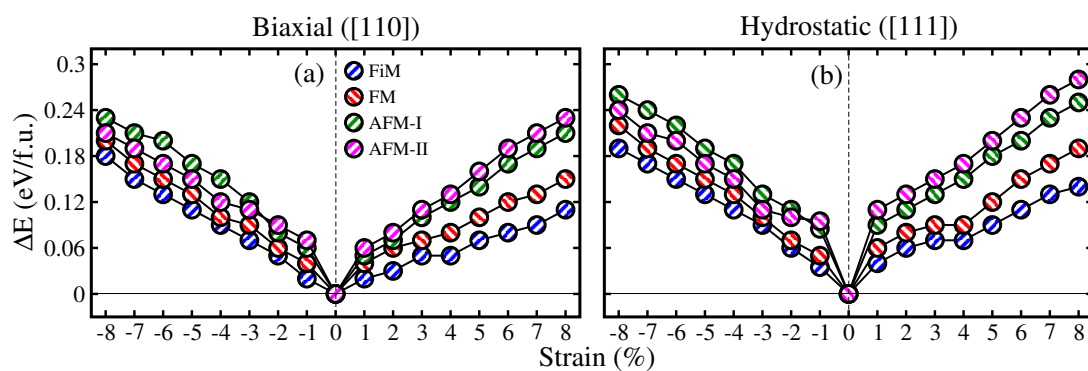

FIG. 1S: Comparison of strain dependence structural stability (*i. e.*, energy versus strain) of the four magnetic spin ordering: (1) ferromagnetic (FM), (2) ferrimagnetic (FiM), (3) antiferromagnetic-I (AFM-I), and (4) antiferromagnetic-II (AFM-II) in  $\text{Lu}_2\text{NiIrO}_6$  double perovskite oxide with in GGA+ $U$ +SOC method for (a) biaxial ([110]) (b) hydrostatic ([111]) strains.

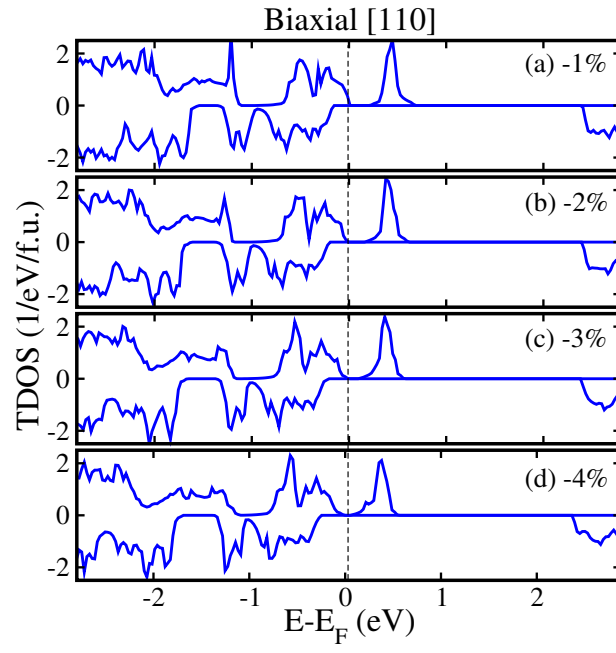

FIG. 2S: Calculated spin-polarized total density of states (TDOS) of  $\text{Lu}_2\text{NiIrO}_6$  DPO for (a)  $-1\%$ , (b)  $-2\%$ , (c)  $-3\%$ , and (d)  $-4\%$  biaxial compressive strains along  $[110]$ -direction.

---

\* Electronic address: [safdar.nazir@uos.edu.pk](mailto:safdar.nazir@uos.edu.pk), Tel: +92-334-971-9060

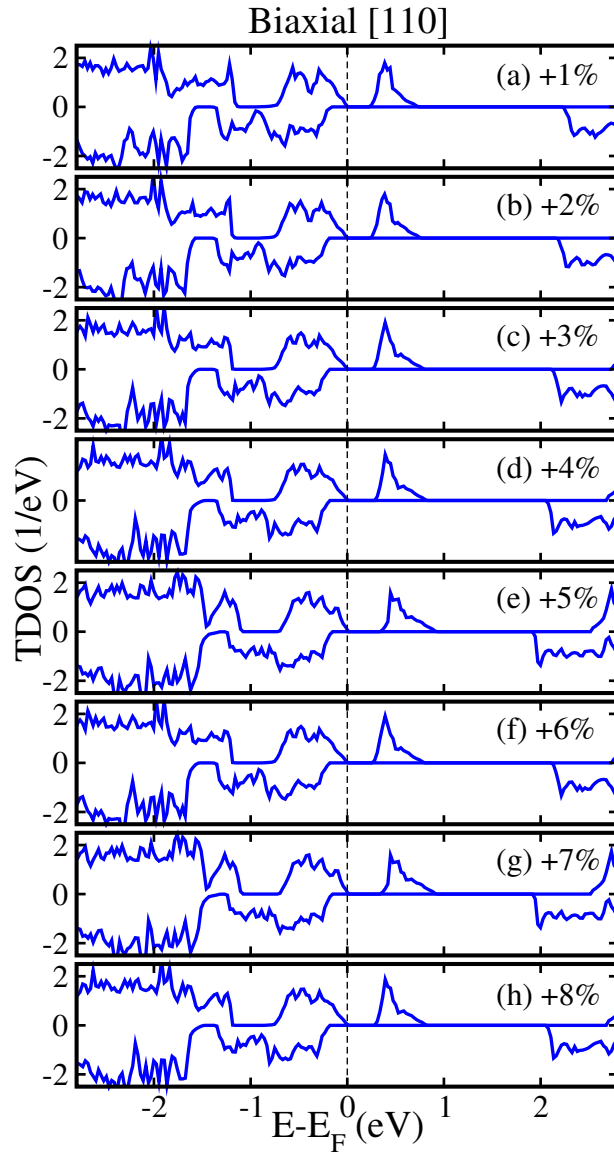

FIG. 3S: Calculated spin-polarized total density of states (TDOS) of  $\text{Lu}_2\text{NiIrO}_6$  DPO for (a) +1%, (b) +2%, (c) +3%, (d) +4%, (e) +5%, (f) +6%, (g) +7%, and (h) +8% biaxial tensile strains along [110]-direction.

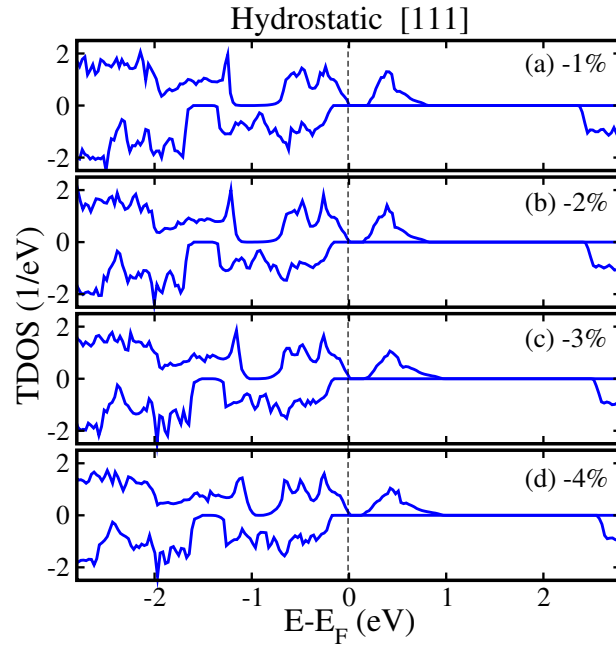

FIG. 4S: Calculated spin-polarized total density of states (TDOS) of  $\text{Lu}_2\text{NiIrO}_6$  DPO for (a)  $-1\%$ , (b)  $-2\%$ , (c)  $-3\%$ , and (d)  $-4\%$  hydrostatic compressive strains along  $[111]$ -direction.

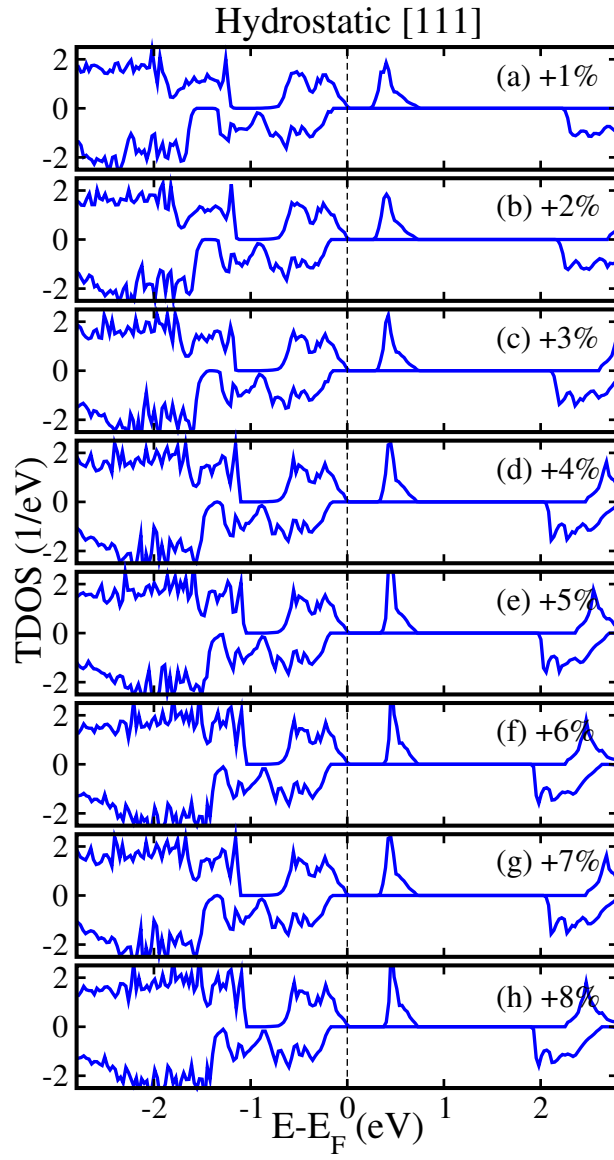

FIG. 5S: Calculated spin-polarized total density of states (TDOS) of  $\text{Lu}_2\text{NiIrO}_6$  DPO for (a) +1%, (b) +2%, (c) +3%, (d) +4%, (e) +5%, (f) +6%, (g) +7%, and (h) +8% hydrostatic tensile strains along [111]-direction.

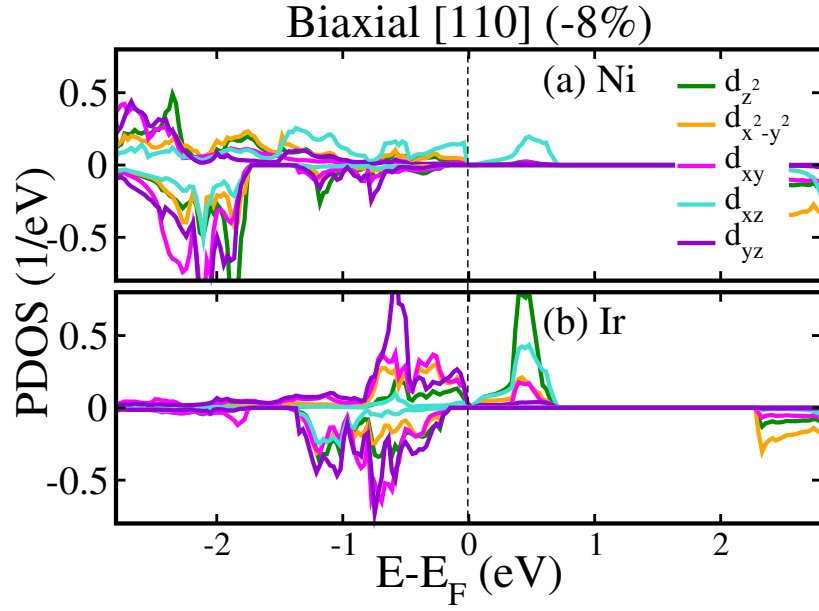

FIG. 6S: Calculated spin-polarized orbital resolved partial density of states (PDOS) for (a) Ni 3d and (b) Ir 5d orbitals of  $\text{Lu}_2\text{NiIrO}_6$  DPO for  $-8\%$  biaxial compressive strain.

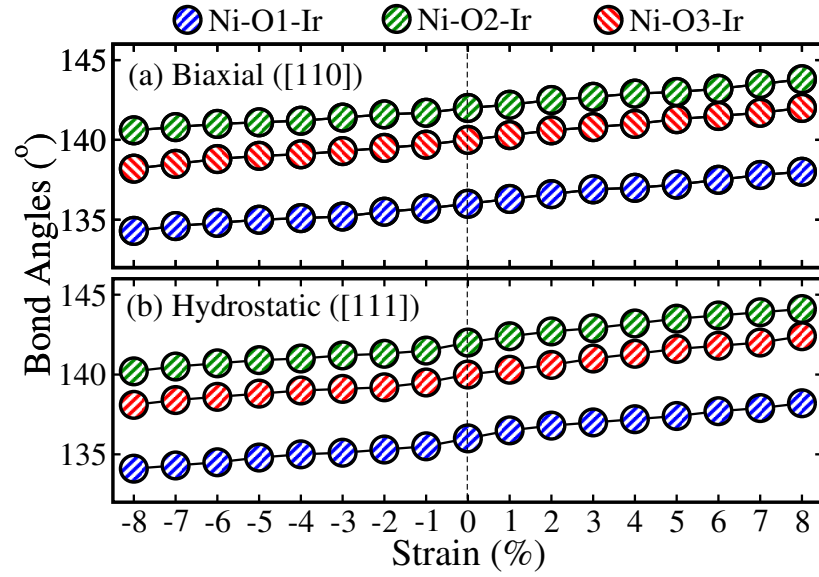

FIG. 7S: Calculated Ni-O1-Ir, Ni-O2-Ir, and Ni-O3-Ir bond angles of  $\text{Lu}_2\text{NiIrO}_6$  DPO as a function of (a) biaxial ([110]) and (b) hydrostatic ([111]) strains.

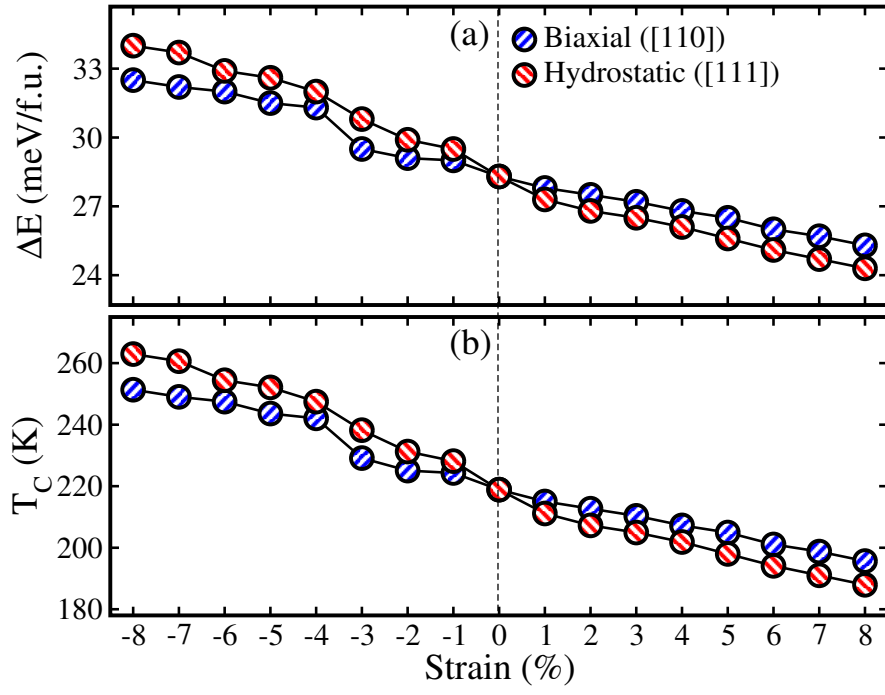

FIG. 8S: Calculated (a)  $\Delta E = E_{FiM} - E_{FM}$  (energy difference between ferrimagnetic (FiM) and ferromagnetic (FM) spin ordering) and (b) magnetic transition temperature ( $T_C$ ) as a function of biaxial ([110]) and hydrostatic ([111]) strains.
